# Supplementary material for: Solution and solid state studies of hydrogen bonding in substituted oxazolidinones by spectroscopic and quantum chemical methods
Source: Royal Society of Chemistry journal article supplement (doi:10.1039/c9nj06349h), 2020-01-01
Supplement: c9nj06349h1.pdf [file c9nj06349h1.pdf]

ARTICLE

**Electronic supplementary information (ESI) for the article:**

**Solution and solid state studies of hydrogen bonding in substituted oxazolidinones by spectroscopic and quantum chemical methods**

Received 00th January 20xx,  
Accepted 00th January 20xx

DOI: 10.1039/x0xx00000x

To be published in:  
*New Journal of Chemistry*

Tomislav Jednačak,<sup>\*a</sup> Maja Majerić Elenkov,<sup>b</sup> Tomica Hrenar,<sup>a</sup> Karlo Sović,<sup>\*a</sup> Jelena Parlov Vuković<sup>c</sup> and Predrag Novak<sup>a</sup>

<sup>a</sup> Department of Chemistry, Faculty of Science, University of Zagreb, Horvatovac 102a, HR-10000 Zagreb, Croatia. E-mails: [tjednacak@chem.pmf.hr](mailto:tjednacak@chem.pmf.hr); [karlo.sovic@chem.pmf.hr](mailto:karlo.sovic@chem.pmf.hr); Tel: +385 1 460 61 95; +385 1 460 60 09

<sup>b</sup> Ruđer Bošković Institute, Bijenička cesta 54, HR-10000, Zagreb, Croatia

<sup>c</sup> Central testing laboratory, Refining & marketing business division, INA-Industrija nafte d.d., Lovinčičeva 4, HR-10000 Zagreb, Croatia

**Table S1** Proton chemical shifts of **1b** and **1c** in DMSO-d<sub>6</sub>, CDCl<sub>3</sub> and CD<sub>3</sub>OD at room temperature

| Atom | $\delta(^1\text{H})/\text{ppm}$ |                   |                    |                     |                   |                    |
|------|---------------------------------|-------------------|--------------------|---------------------|-------------------|--------------------|
|      | <b>1b</b>                       |                   |                    | <b>1c</b>           |                   |                    |
|      | DMSO-d <sub>6</sub>             | CDCl <sub>3</sub> | CD <sub>3</sub> OD | DMSO-d <sub>6</sub> | CDCl <sub>3</sub> | CD <sub>3</sub> OD |
| 3    | 7.61                            | 5.82              | 4.59               | 7.40                | 5.82              | 4.60               |
| 4    | 3.21, 3.59                      | 3.51, 3.77        | 3.45, 3.74         | 3.08, 3.52          | 3.25, 3.67        | 3.23, 3.66         |
| 5    | 4.81                            | 4.85              | 4.91               | 4.46                | 4.58              | 4.60               |
| 6    | 3.69, 3.75                      | 3.52, 3.58        | 3.65, 3.71         | 1.59, 1.62          | 1.71, 1.81        | 1.71, 1.74         |
| 6-Me | –                               | –                 | –                  | 0.89                | 1.01              | 1.00               |

**Table S2** Proton chemical shifts of **2b** and **2c** in DMSO-d<sub>6</sub>, CDCl<sub>3</sub> and CD<sub>3</sub>OD at room temperature

| Atom | $\delta(^1\text{H})/\text{ppm}$ |                   |                    |                     |                   |                    |
|------|---------------------------------|-------------------|--------------------|---------------------|-------------------|--------------------|
|      | <b>2b</b>                       |                   |                    | <b>2c</b>           |                   |                    |
|      | DMSO-d <sub>6</sub>             | CDCl <sub>3</sub> | CD <sub>3</sub> OD | DMSO-d <sub>6</sub> | CDCl <sub>3</sub> | CD <sub>3</sub> OD |
| 3    | 7.60                            | 5.85              | 4.88               | 7.38                | 5.91              | 4.58               |
| 4    | 3.27, 3.41                      | 3.38, 3.71        | 3.66               | 3.14, 3.25          | 3.27, 3.40        | 3.28, 3.41         |
| 5-Me | 1.47                            | 1.66              | 1.60               | 1.30                | 1.44              | 1.41               |
| 6    | 3.72                            | 3.47, 3.58        | 3.64, 3.69         | 1.60, 1.63          | 1.72, 1.76        | 1.71, 1.75         |
| 6-Me | –                               | –                 | –                  | 0.87                | 0.98              | 0.97               |

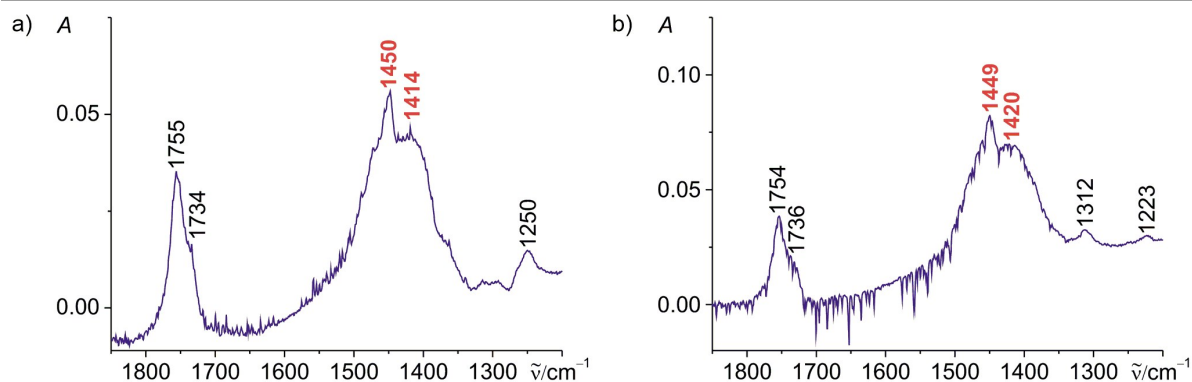**Fig. S1** ATR-IR spectra of (a) **1a** and (b) **2a** in CH<sub>3</sub>OH in the range 1850–1200 cm<sup>-1</sup>. Wavenumbers corresponding to the solvent vibrational bands are shown in bold and red.

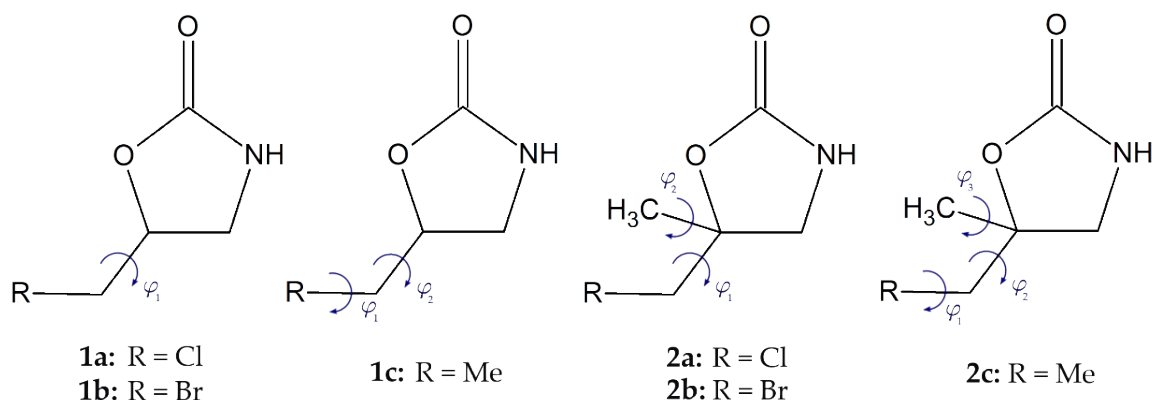

**Scheme S1** Relevant torsional coordinates for compounds **1a–1c** and **2a–2c**.

**Table S3** Calculated standard Gibbs energies of formation and content at  $T = 298.15$  K and  $p = 101325$  Pa for conformers of **1a** (B3LYP/6-311++g(d,p) level of theory, relative to the most stable conformer)

| Conformer | $\Delta_f G^\circ_{\text{rel.}} / \text{kcal mol}^{-1}$ | Content / % |
|-----------|---------------------------------------------------------|-------------|
| 1a1       | 0.00                                                    | 84.3        |
| 1a2       | 1.13                                                    | 12.4        |
| 1a3       | 1.92                                                    | 3.3         |

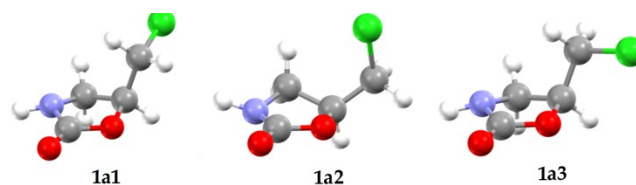

**Fig. S2** Conformers of **1a** (B3LYP/6-311++g(d,p) level of theory).

**Table S4** Calculated standard Gibbs energies of formation and content at  $T = 298.15$  K and  $p = 101325$  Pa for conformers of **2a** (B3LYP/6-311++g(d,p) level of theory, relative to the most stable conformer)

| Conformer | $\Delta_f G^\circ_{\text{rel.}} / \text{kcal mol}^{-1}$ | Content / % |
|-----------|---------------------------------------------------------|-------------|
| 2a1       | 0.00                                                    | 87.4        |
| 2a2       | 1.29                                                    | 9.85        |
| 2a3       | 2.05                                                    | 2.75        |

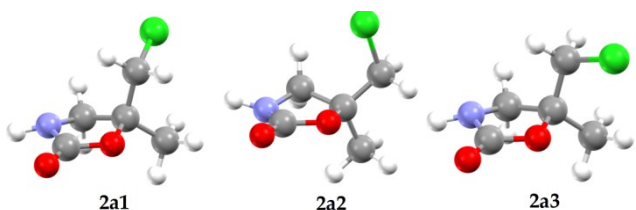

**Fig. S3** Conformers of **2a** (B3LYP/6-311++g(d,p) level of theory).

**Table S5** Calculated standard Gibbs energies of formation and content at  $T = 298.15$  K and  $p = 101325$  Pa for conformers of **1b** (B3LYP/6-311++g(d,p) level of theory, relative to the most stable conformer)

| Conformer | $\Delta_f G^\circ_{\text{rel.}} / \text{kcal mol}^{-1}$ | Content / % |
|-----------|---------------------------------------------------------|-------------|
| 1b1       | 0.00                                                    | 78.1        |
| 1b2       | 0.79                                                    | 20.6        |
| 1b3       | 2.42                                                    | 1.3         |

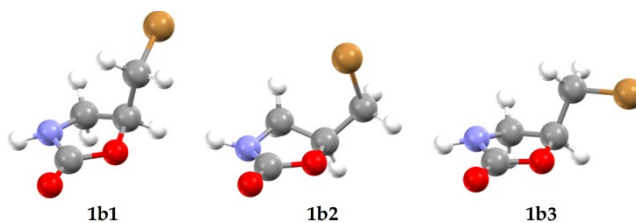

**Fig. S4** Conformers of **1b** (B3LYP/6-311++g(d,p) level of theory).

**Table S6** Calculated standard Gibbs energies of formation and content at  $T = 298.15$  K and  $p = 101325$  Pa for conformers of **2b** (B3LYP/6-311++g(d,p) level of theory, relative to the most stable conformer)

| Conformer | $\Delta_f G^\circ_{\text{rel.}} / \text{kcal mol}^{-1}$ | Content / % |
|-----------|---------------------------------------------------------|-------------|
| 2b1       | 0.00                                                    | 86.3        |
| 2b2       | 1.16                                                    | 12.2        |
| 2b3       | 2.40                                                    | 1.5         |

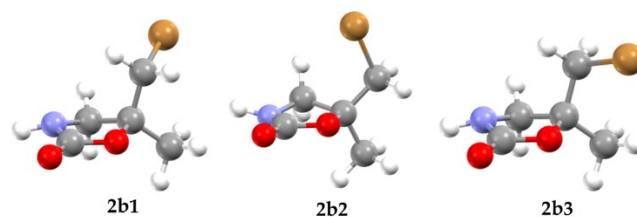

**Fig. S5** Conformers of **2b** (B3LYP/6-311++g(d,p) level of theory).

**Table S7** Calculated standard Gibbs energies of formation and content at  $T = 298.15$  K and  $p = 101325$  Pa for conformers of **1c** (B3LYP/6-311++g(d,p) level of theory, relative to the most stable conformer).

| Conformer | $\Delta_f G^\circ_{\text{rel.}} / \text{kcal mol}^{-1}$ | Content / % |
|-----------|---------------------------------------------------------|-------------|
| 1c1       | 0.00                                                    | 60.9        |
| 1c2       | 0.47                                                    | 27.7        |
| 1c3       | 0.99                                                    | 11.4        |

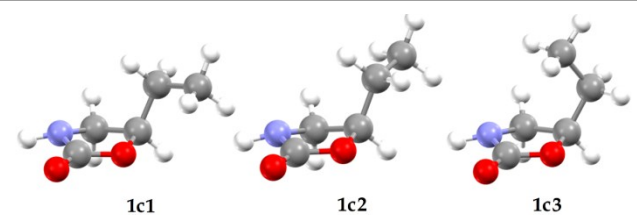

**Fig. S6** Conformers of **1c** (B3LYP/6-311++g(d,p) level of theory).

**Table S8** Calculated standard Gibbs energies of formation and content at  $T = 298.15$  K and  $p = 101325$  Pa for conformers of **2c** (B3LYP/6-311++g(d,p) level of theory, relative to the most stable conformer)

| Conformer | $\Delta_f G^\circ_{\text{rel.}} / \text{kcal mol}^{-1}$ | Content / % |
|-----------|---------------------------------------------------------|-------------|
| 2c1       | 0.00                                                    | 40.5        |
| 2c2       | 0.01                                                    | 39.7        |
| 2c3       | 0.42                                                    | 19.8        |

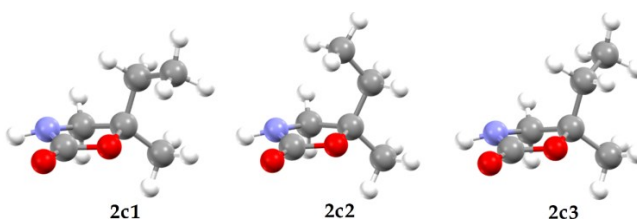

**Fig. S7** Conformers of **2c** (B3LYP/6-311++g(d,p) level of theory).

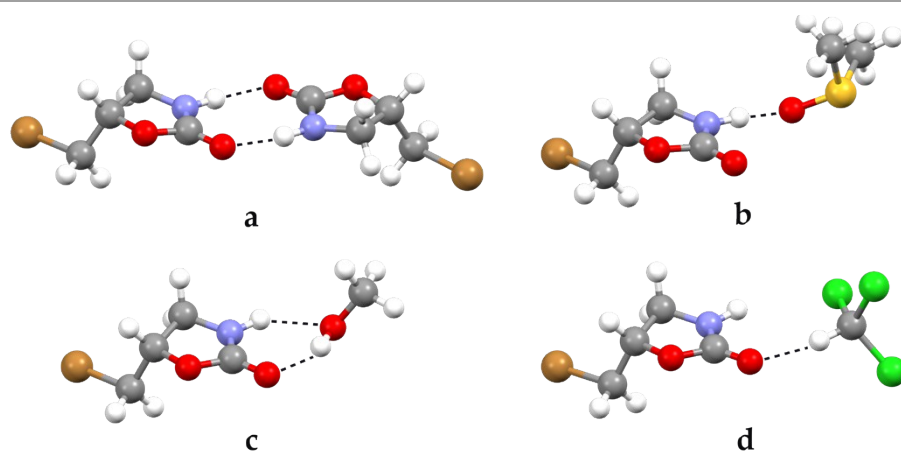

**Fig. S8** Optimised geometries of (a) **1b** dimer, (b) **1b**-DMSO complex, (c) **1b**-MeOH complex and (d) **1b**-CHCl<sub>3</sub> complex at the B3LYP/6-311++G(d,p) level of theory using IEFPCM for incorporating solvent effects.

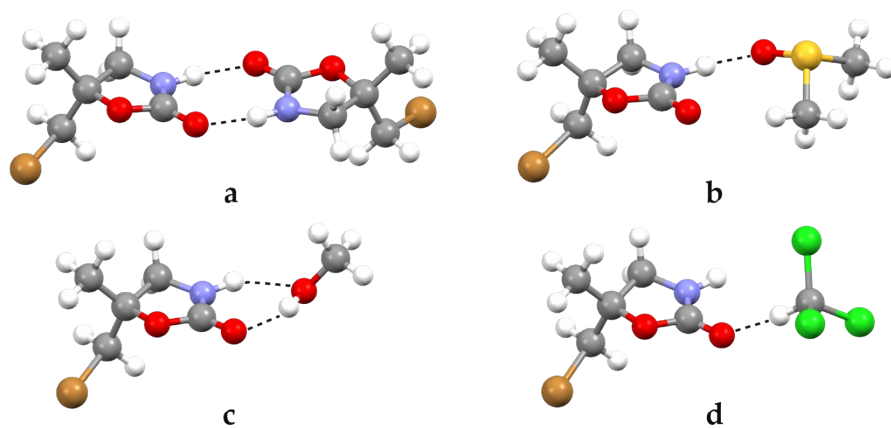

**Fig. S9** Optimised geometries of (a) **2b** dimer, (b) **2b**-DMSO complex, (c) **2b**-MeOH complex and (d) **2b**-CHCl<sub>3</sub> complex at the B3LYP/6-311++G(d,p) level of theory using IEFPCM for incorporating solvent effects.

---

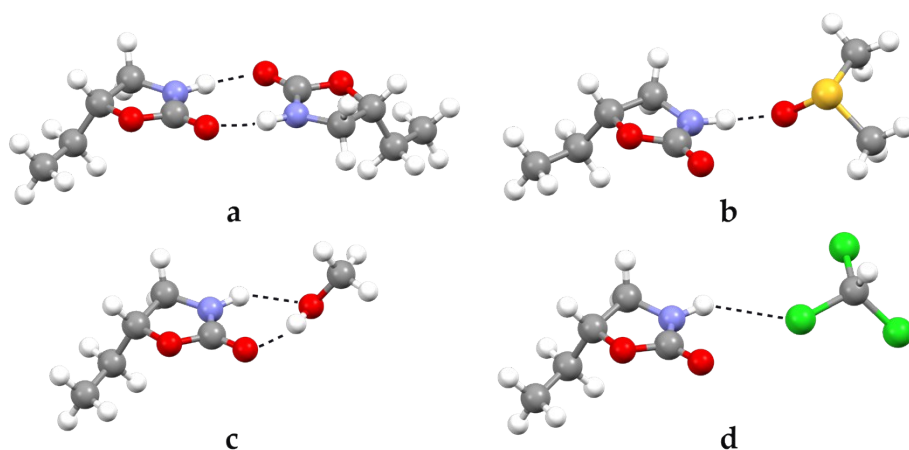

**Fig. S10** Optimised geometries of (a) **1c** dimer, (b) **1c**-DMSO complex, (c) **1c**-MeOH complex and (d) **1c**-CHCl<sub>3</sub> complex at the B3LYP/6-311++G(d,p) level of theory using IEFPCM for incorporating solvent effects.

---

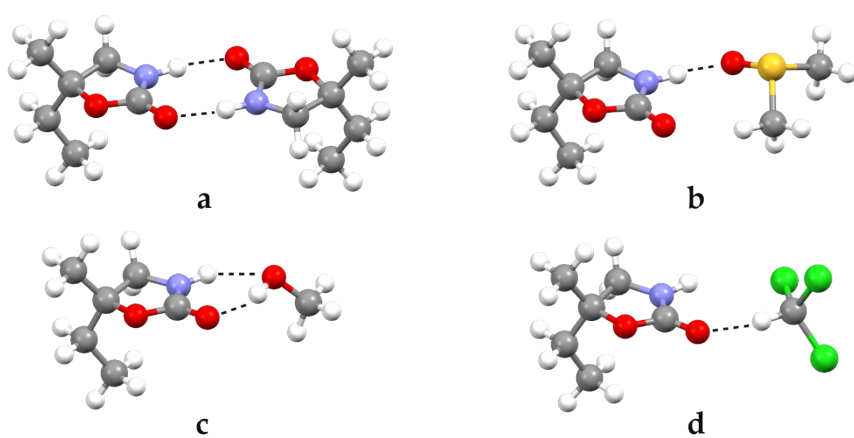

**Fig. S11** Optimised geometries of (a) **2c** dimer, (b) **2c**-DMSO complex, (c) **2c**-MeOH complex and (d) **2c**-CHCl<sub>3</sub> complex at the B3LYP/6-311++G(d,p) level of theory using IEFPCM for incorporating solvent effects.

---

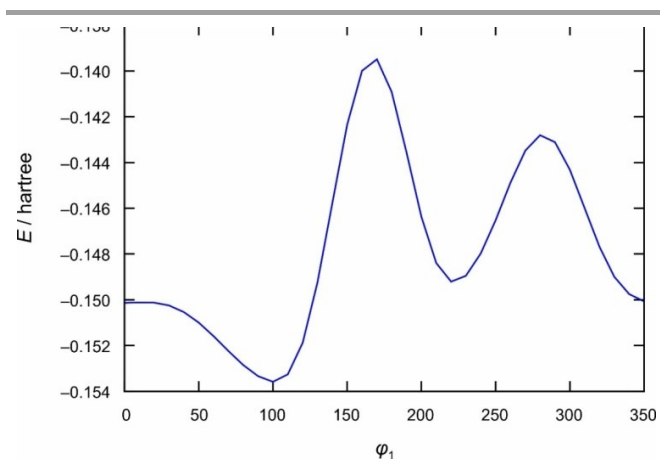

**Fig. S12** Potential energy surface of **1a** spanned by one torsional coordinate.

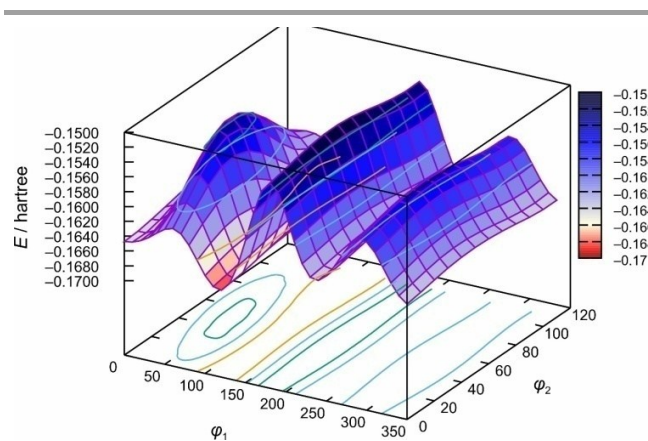

**Fig. S15** Potential energy surface of **2a** spanned by two torsional coordinates.

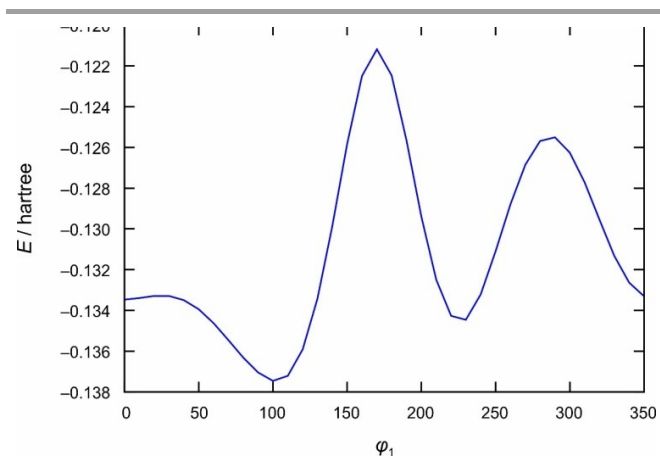

**Fig. S13** Potential energy surface of **1b** spanned by one torsional coordinate.

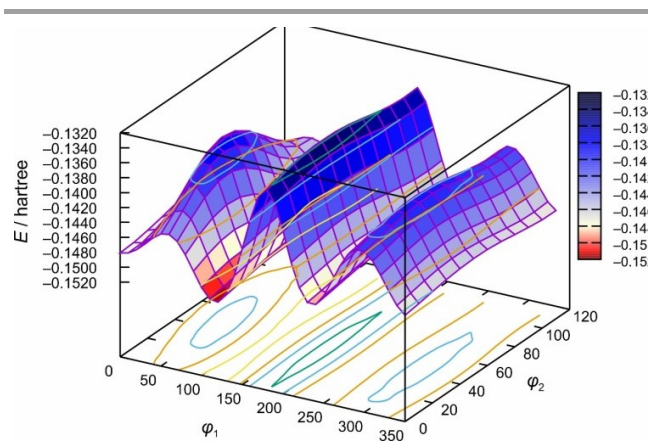

**Fig. S16** Potential energy surface of **2b** spanned by two torsional coordinates.

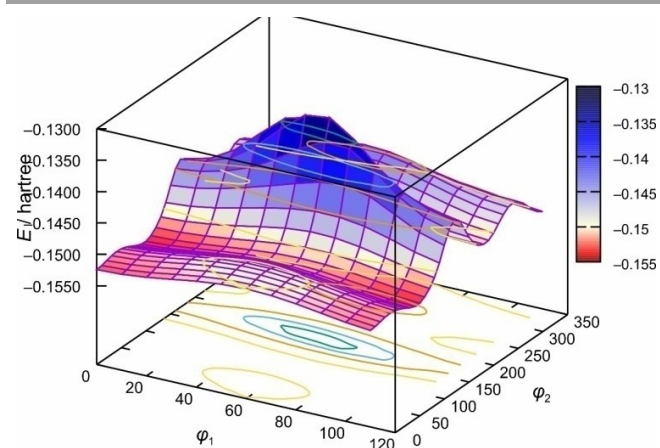

**Fig. S14** Potential energy surface of **1c** spanned by two torsional coordinates.

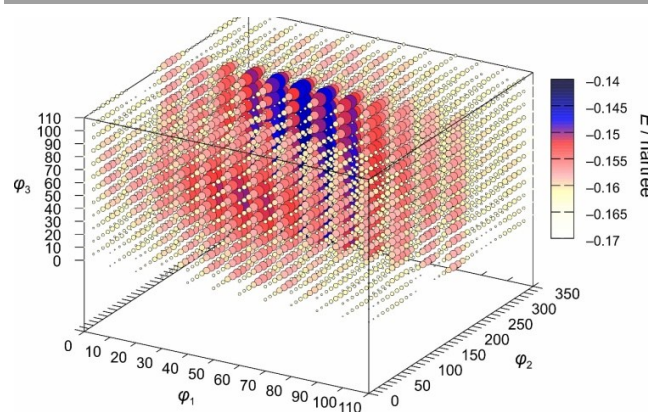

**Fig. S17** Potential energy surface of **2c** spanned by three torsional coordinates.

**Table S9** Estimation of stability of **1b** complexes by subtraction of standard Gibbs energies of complexes from individual moieties and ordered relative to the most stable configuration (B3LYP/6-311++G(d,p) level of theory and IEFPCM for incorporating solvent effects)

| System                       | IEFPCM solvent    | $\Delta\Delta_f G^\circ_{rel.} / \text{kJ mol}^{-1}$ |
|------------------------------|-------------------|------------------------------------------------------|
| <b>1b</b> –DMSO              | dimethylsulfoxide | 0.00                                                 |
| <b>1b</b> – <b>1b</b>        | methanol          | 11.65                                                |
| <b>1b</b> – <b>1b</b>        | dimethylsulfoxide | 12.07                                                |
| <b>1b</b> – <b>1b</b>        | chloroform        | 12.15                                                |
| <b>1b</b> –MeOH              | methanol          | 20.22                                                |
| <b>1b</b> –CHCl <sub>3</sub> | chloroform        | 22.05                                                |

**Table S11** Estimation of stability of **2c** complexes by subtraction of standard Gibbs energies of complexes from individual moieties and ordered relative to the most stable configuration (B3LYP/6-311++G(d,p) level of theory and IEFPCM for incorporating solvent effects).

| System                       | IEFPCM solvent    | $\Delta\Delta_f G^\circ_{rel.} / \text{kJ mol}^{-1}$ |
|------------------------------|-------------------|------------------------------------------------------|
| <b>2c</b> – <b>2c</b>        | chloroform        | 0.00                                                 |
| <b>2c</b> – <b>2c</b>        | methanol          | 9.26                                                 |
| <b>2c</b> – <b>2c</b>        | dimethylsulfoxide | 9.46                                                 |
| <b>2c</b> –DMSO              | dimethylsulfoxide | 13.72                                                |
| <b>2c</b> –MeOH              | methanol          | 15.74                                                |
| <b>2c</b> –CHCl <sub>3</sub> | chloroform        | 17.88                                                |

**Table S10** Estimation of stability of **1c** complexes by subtraction of standard Gibbs energies of complexes from individual moieties and ordered relative to the most stable configuration (B3LYP/6-311++G(d,p) level of theory and IEFPCM for incorporating solvent effects)

| System                       | IEFPCM solvent    | $\Delta\Delta_f G^\circ_{rel.} / \text{kJ mol}^{-1}$ |
|------------------------------|-------------------|------------------------------------------------------|
| <b>1c</b> – <b>1c</b>        | chloroform        | 0.00                                                 |
| <b>1c</b> – <b>1c</b>        | methanol          | 6.24                                                 |
| <b>1c</b> – <b>1c</b>        | dimethylsulfoxide | 6.55                                                 |
| <b>1c</b> –DMSO              | dimethylsulfoxide | 7.78                                                 |
| <b>1c</b> –MeOH              | methanol          | 15.81                                                |
| <b>1c</b> –CHCl <sub>3</sub> | chloroform        | 21.77                                                |

**Table S12** Characteristic Raman vibrational modes of **1a**–**1c** and **2a**–**2c**.

| Vibrational mode      | $\tilde{\nu} / \text{cm}^{-1}$ |            |            |            |            |            |
|-----------------------|--------------------------------|------------|------------|------------|------------|------------|
|                       | <b>1a</b>                      | <b>1b</b>  | <b>1c</b>  | <b>2a</b>  | <b>2b</b>  | <b>2c</b>  |
| $\nu(\text{C-H})$     | 2966, 2910                     | 2961, 2904 | 2969, 2912 | 2961, 2936 | 2956, 2929 | 2940, 2905 |
| $\nu(\text{C=O})$     | 1725                           | 1722       | 1746, 1706 | 1719, 1703 | 1746, 1700 | 1747, 1698 |
| $\delta(\text{CH}_2)$ | 1493, 1428                     | 1490, 1423 | 1486, 1436 | 1487, 1450 | 1484, 1447 | 1496, 1452 |
| $\nu_s(\text{C-O})^a$ | 1075                           | 1064       | 1077       | 1073       | 1088       | 1051       |
| $\nu(\text{C-C})$     | 967                            | 964        | 988        | 996        | 996        | 988        |
| $\nu(\text{C-Cl})$    | 735, 656                       | –          | –          | 750, 705   | –          | –          |
| $\nu(\text{C-Br})$    | –                              | 653, 532   | –          | –          | 689, 586   | –          |

<sup>a</sup> $\nu_s$  - Symmetric stretching.
